# Supplementary material for: Photo-thermal coupling to enhance CO2 hydrogenation toward CH4 over Ru/MnO/Mn3O4
Source: PubMed Central journal article supplement (PMC10847166; doi:10.1038/s41467-024-45389-7), 2024-02-06
Supplement: 41467_2024_45389_MOESM1_ESM.pdf [file 41467_2024_45389_MOESM1_ESM.pdf]

## Supporting Information

### Photo-thermal coupling to enhance CO<sub>2</sub> hydrogenation toward CH<sub>4</sub> over Ru/MnO/Mn<sub>3</sub>O<sub>4</sub>

Jianxin Zhai<sup>1,2</sup>, Zhanghui Xia<sup>1,2</sup>, Baowen Zhou<sup>3\*</sup>, Haihong Wu<sup>1,2\*</sup>, Teng Xue<sup>1,2</sup>, Xiao Chen<sup>1,2</sup>, Jiapeng Jiao<sup>1,2</sup>, Shuaiqiang Jia<sup>1,2</sup>, Mingyuan He<sup>1,2\*</sup>, and Buxing Han<sup>1,2,4\*</sup>

1. Shanghai Key Laboratory of Green Chemistry and Chemical Processes, State Key Laboratory of Petroleum Molecular & Process Engineering, School of Chemistry and Molecular Engineering, East China Normal University, Shanghai 200062, China
2. Institute of Eco-Chongming, Shanghai 202162, China
3. Key Laboratory for Power Machinery and Engineering of Ministry of Education, Research Center for Renewable Synthetic Fuel, School of Mechanical Engineering, Shanghai Jiao Tong University, Shanghai 200240, China
4. Beijing National Laboratory for Molecular Sciences, CAS Key Laboratory of Colloid and Interface and Thermodynamics, CAS Research/Education Center for Excellence in Molecular Sciences, Institute of Chemistry, Chinese Academy of Sciences, Beijing, 100190, China

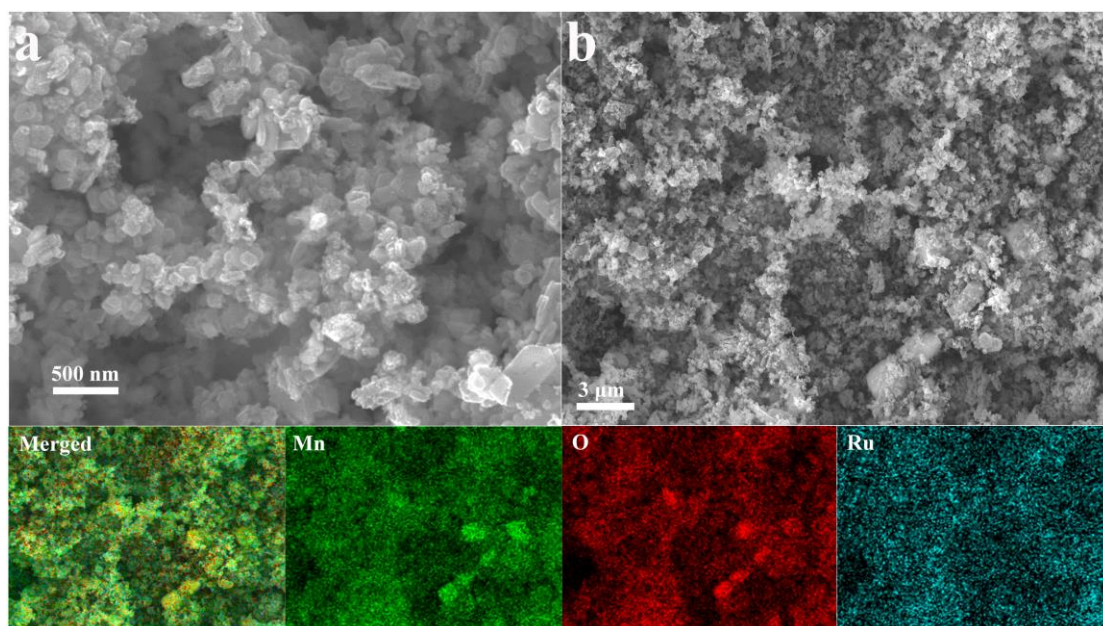

**Supplementary Fig. 1** SEM image of (a) Ru/MnO<sub>x</sub>; (b) The elemental mapping of Ru/MnO<sub>x</sub>.

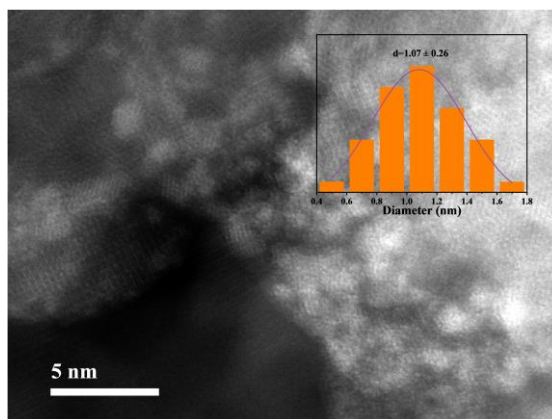

**Supplementary Fig. 2** The high angle annular dark-field scanning transmission electron microscope (HAADF-STEM) image of the Ru/MnO<sub>x</sub> catalyst.

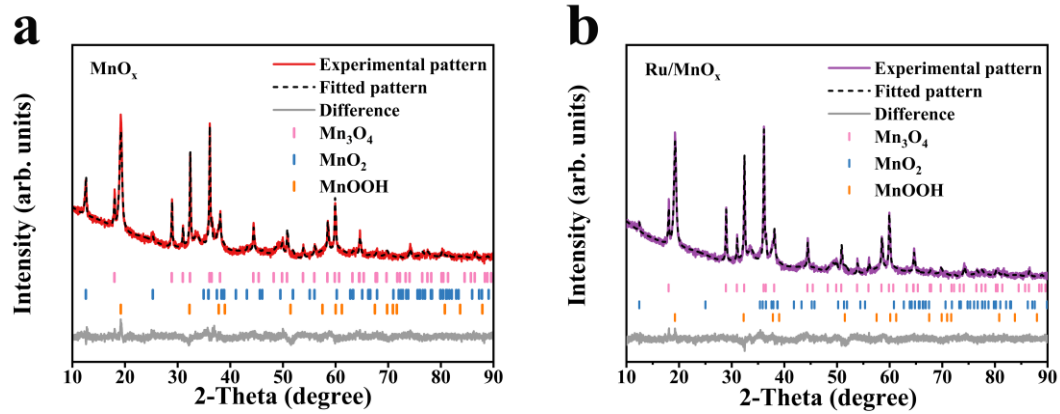

**Supplementary Fig. 3** Rietveld refinement result of XRD patterns: (a)  $\text{MnO}_x$ ; (b)  $\text{Ru/MnO}_x$ .

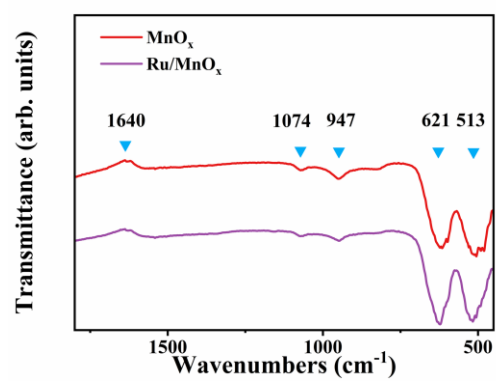

**Supplementary Fig. 4** FT-IR spectra of MnO<sub>x</sub> and Ru/MnO<sub>x</sub>.

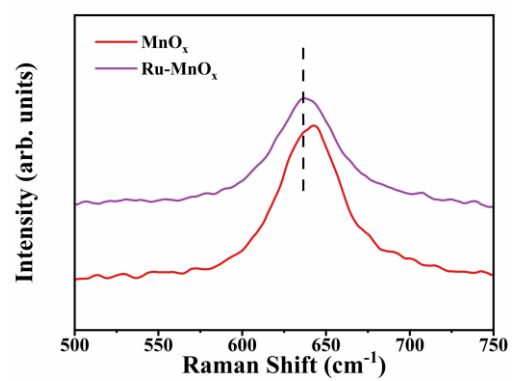

**Supplementary Fig. 5** Raman spectra of MnO<sub>x</sub> and Ru/MnO<sub>x</sub>.

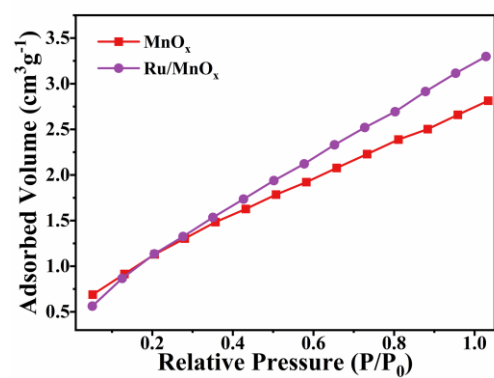

**Supplementary Fig. 6** CO<sub>2</sub> adsorption isotherms of MnO<sub>x</sub> and Ru/MnO<sub>x</sub>.

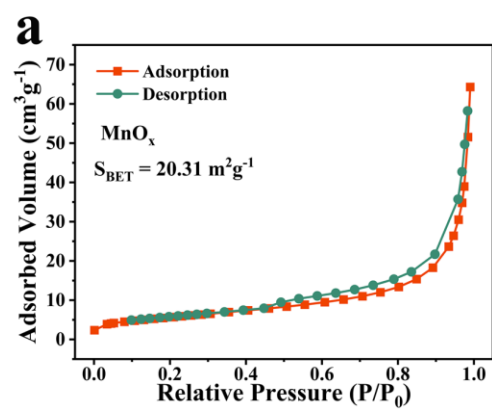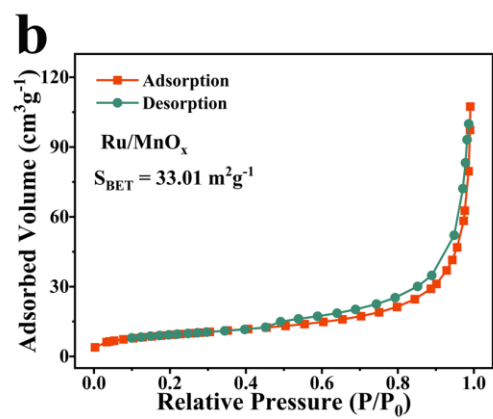

Supplementary Fig. 7  $\text{N}_2$  adsorption-desorption isotherms of (a)  $\text{MnO}_x$ ; (b)  $\text{Ru/MnO}_x$ .



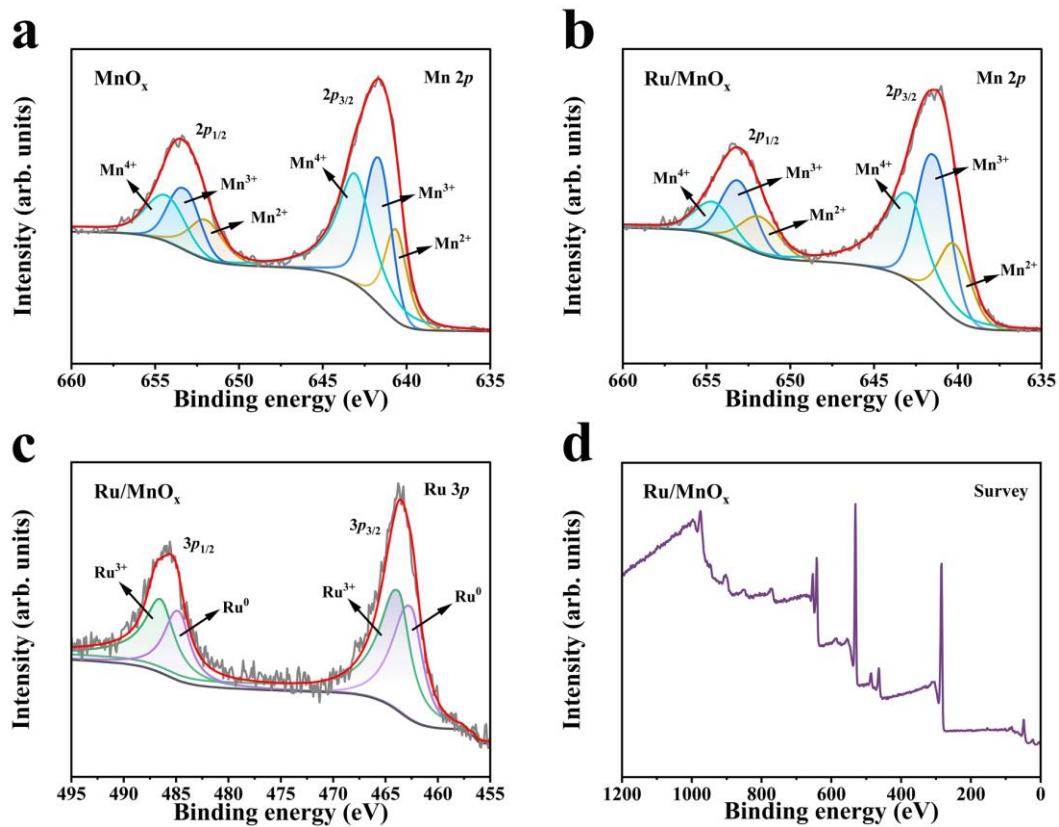

**Supplementary Fig. 8** (a-b) High-resolution Mn 2p XPS spectra of  $\text{MnO}_x$  and  $\text{Ru/MnO}_x$ ; (c) High-resolution Ru 3p XPS spectra of  $\text{Ru/MnO}_x$ ; (d) XPS survey spectrum of  $\text{Ru/MnO}_x$ .

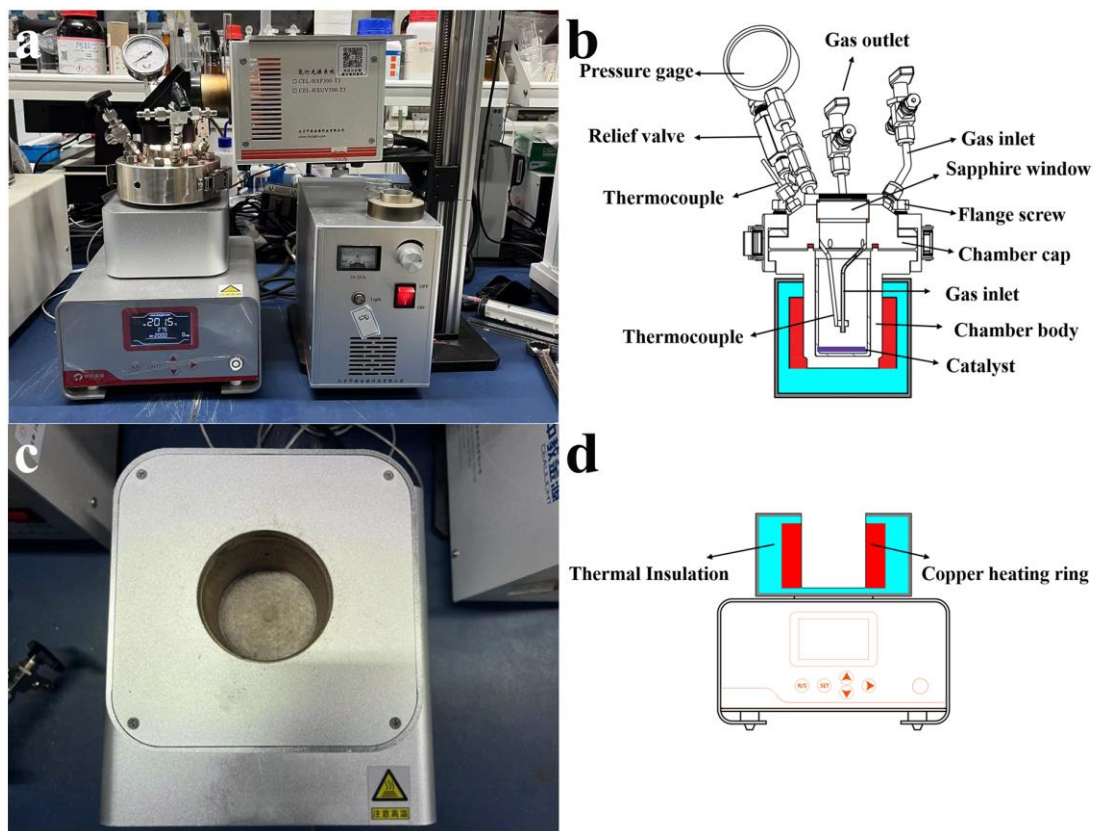

**Supplementary Fig. 9** (a) Photograph of the apparatus setup for photo-thermal CO<sub>2</sub> experiments in the batch reactor; (b) Schematic illustration of the photo-thermal reactor; (c) and (d) Schematic illustration of the heating system.

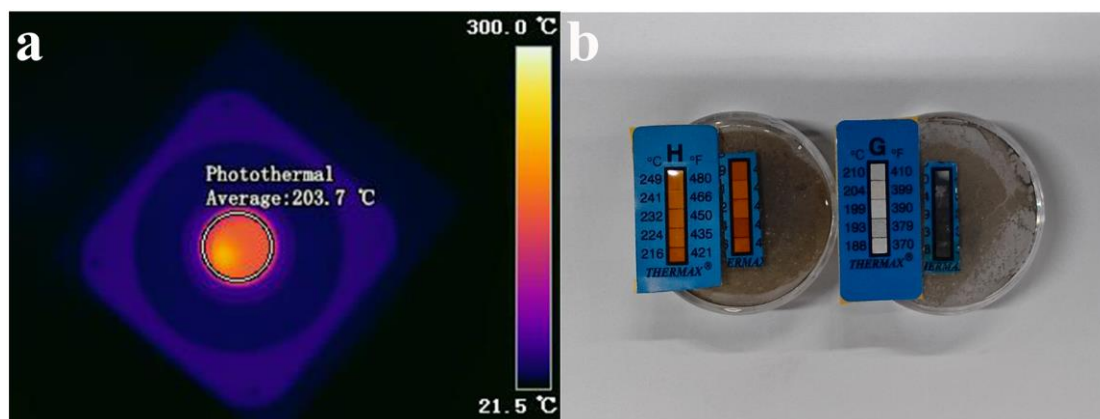

**Supplementary Fig. 10** (a) Infrared thermal images captured for the catalyst surface temperature under  $2.5 \text{ W cm}^{-2}$  irradiation, 0.1 MPa and external heating (Set temperature:  $200 \text{ }^{\circ}\text{C}$ ); (b) The temperature at the bottom of the catalyst, measured using a commercially available thermochromic temperature indicator.

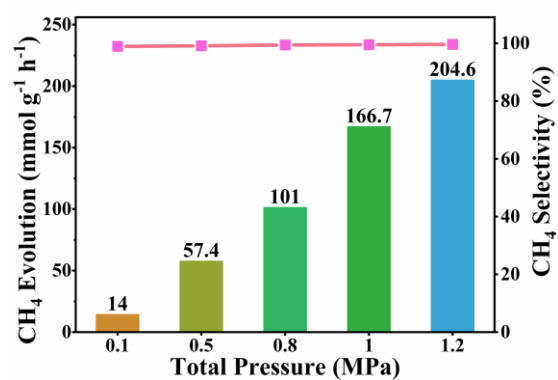

**Supplementary Fig. 11** Influence of total pressure on CH<sub>4</sub> evolution rate over Ru/MnO<sub>x</sub>; Reaction conditions: 15 mg of catalyst, full-arc 300 W UV-xenon lamp, 2.5 W cm<sup>-2</sup>, 200 °C, irradiation time 4 hours, H<sub>2</sub>/CO<sub>2</sub>=4/1.

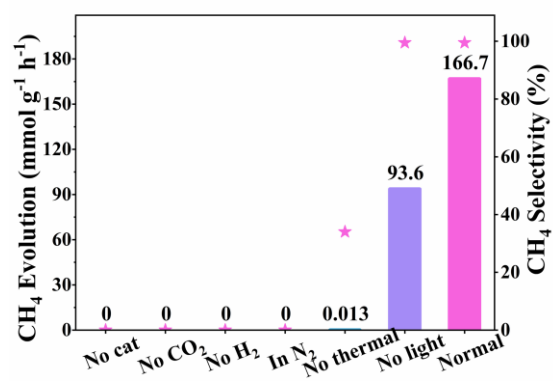

**Supplementary Fig. 12** Control experiments for Ru/MnO<sub>x</sub> under various conditions. Reaction conditions: 15 mg of catalyst, full-arc 300 W UV-xenon lamp, 2.5 W cm<sup>-2</sup>, 200 °C, irradiation time 4 hours, initial pressure 1 MPa (H<sub>2</sub>/CO<sub>2</sub>=4/1).

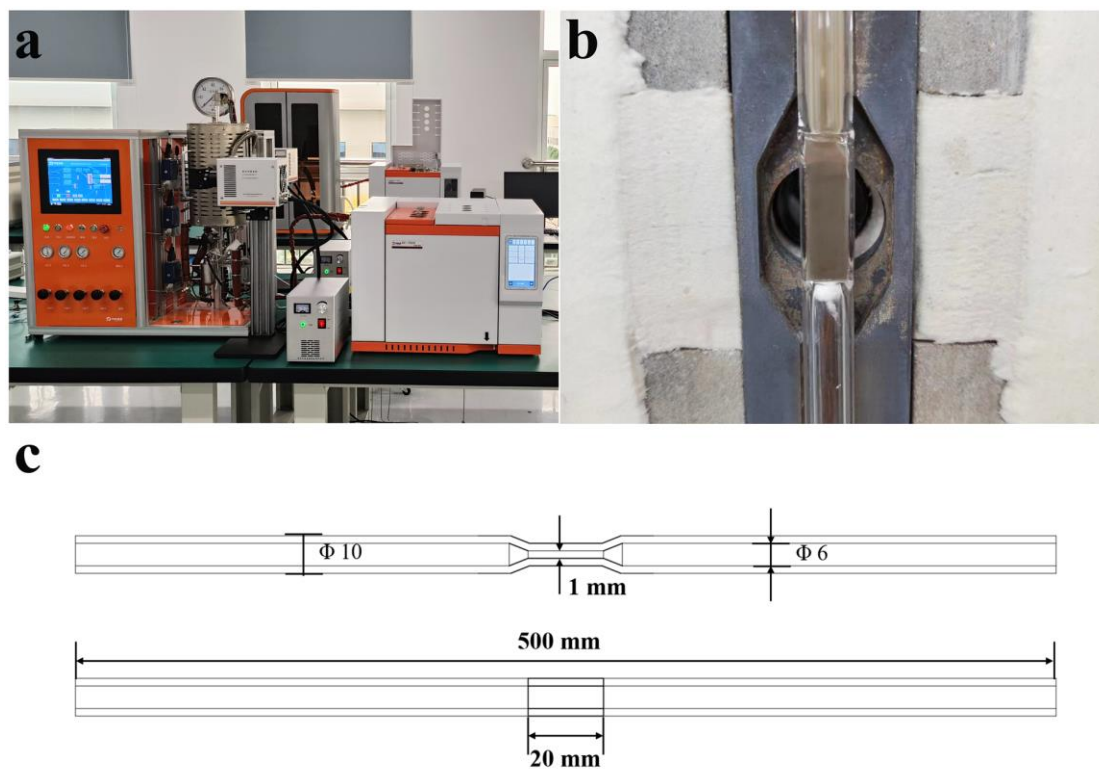

**Supplementary Fig. 13** The images of (a) the photo-thermal catalytic performance evaluation process carried out in the flow reaction system and (b) the fixed-bed quartz tube reactor. (c) Dimensions of the fixed-bed quartz tube reactor.

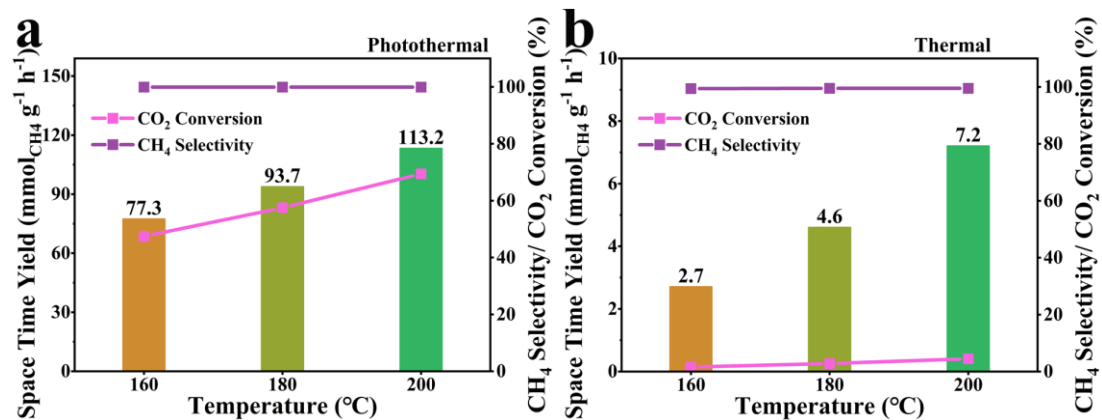

**Supplementary Fig. 14** Temperature-dependent space time yield of CH<sub>4</sub> over Ru/MnO<sub>x</sub> under photothermal (a) and thermal (b) conditions. Reaction conditions: 150 mg of catalyst, full-arc 300 W UV-xenon lamp, 2.5 W cm<sup>-2</sup>, initial pressure 0.1 MPa, CO<sub>2</sub>/H<sub>2</sub> mixture flow (10 mL min<sup>-1</sup>/40 mL min<sup>-1</sup>).

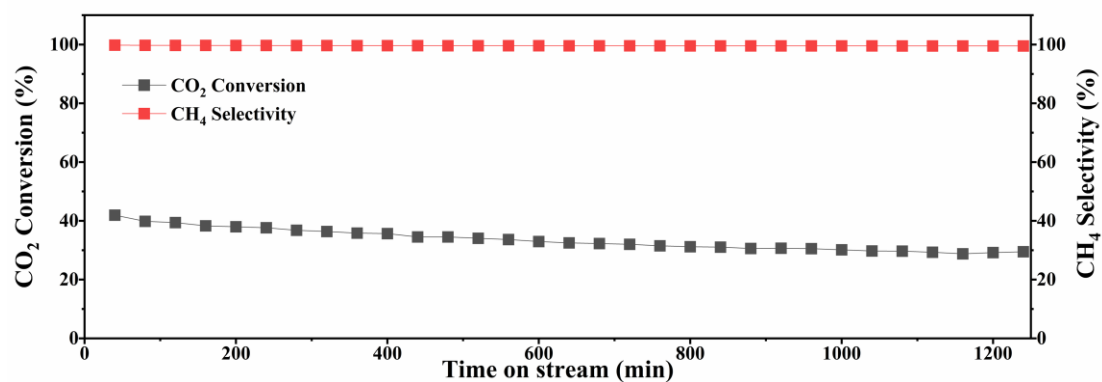

**Supplementary Fig. 15** The photothermal catalytic performance of Ru/MnO<sub>x</sub> catalyst in a fixed-bed reactor. Reaction conditions: 150 mg of catalyst, full-arc 300 W UV-xenon lamp, 2.5 W cm<sup>-2</sup>, 200 °C, initial pressure 0.1 MPa, CO<sub>2</sub>/H<sub>2</sub> mixture flow (20 mL min<sup>-1</sup>/80 mL min<sup>-1</sup>).



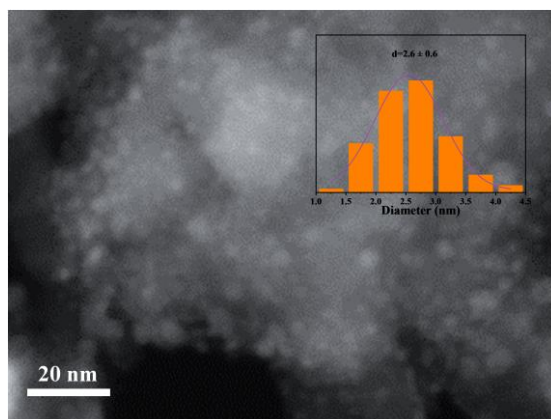

**Supplementary Fig. 16** TEM image of Ru/MnO<sub>x</sub> after reaction of 20 h at 200 °C under photothermal condition in the fixed-bed reactor.

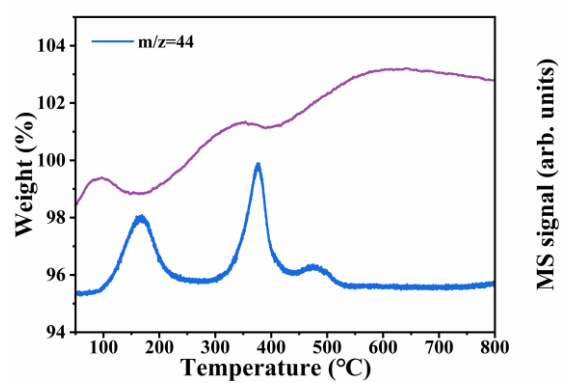

**Supplementary Fig. 17** TG-MS analysis of Ru/MnO<sub>x</sub> after reaction of 20 h at 200 °C under photothermal condition in the fixed-bed reactor.

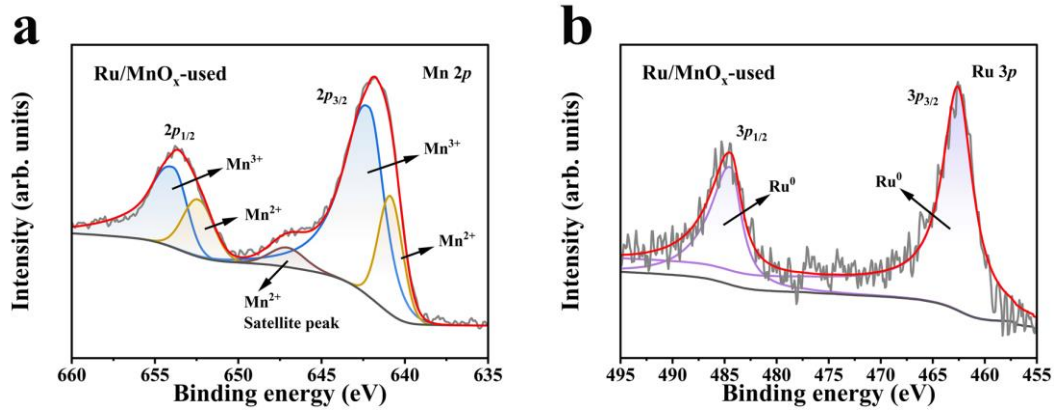

**Supplementary Fig. 18** XPS spectra of Ru/MnO<sub>x</sub> after reaction in 4 h at 200 °C in the batch reactor: (a) High-resolution of Mn 2*p* XPS spectra; (b) High-resolution of Ru 3*p* XPS spectra.

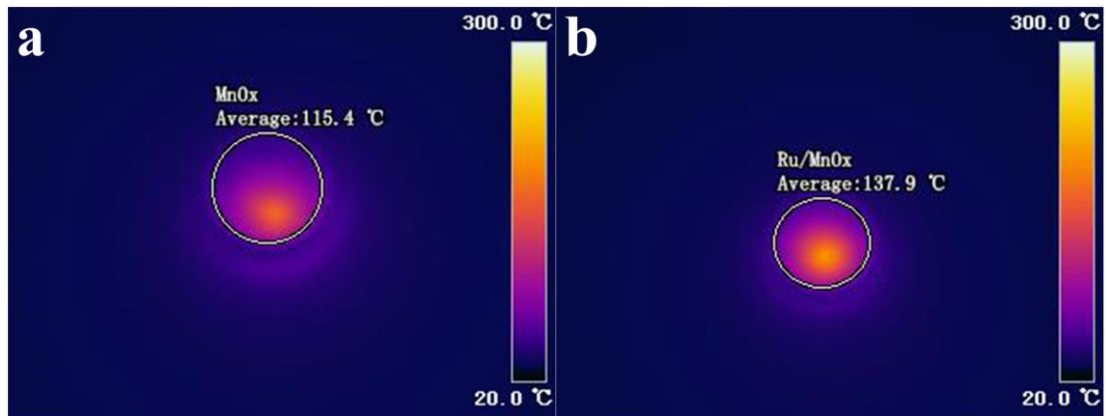

**Supplementary Fig. 19** Infrared thermal images captured for (a)  $\text{MnO}_x$  and (b)  $\text{Ru/MnO}_x$  under  $2.5 \text{ W cm}^{-2}$  illumination.

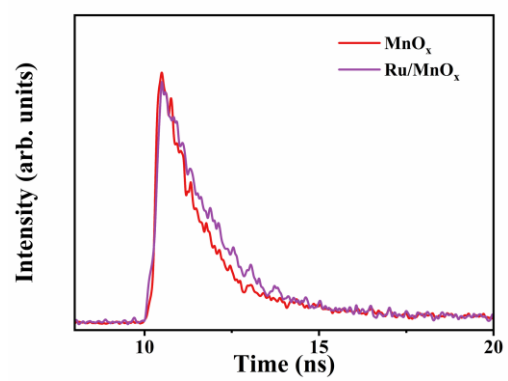

**Supplementary Fig. 20** TRPL spectra of  $\text{MnO}_x$  and  $\text{Ru/MnO}_x$ .

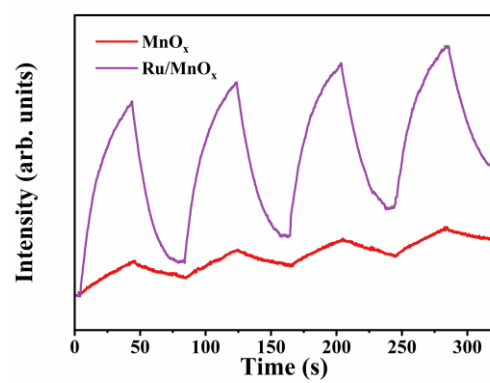

**Supplementary Fig. 21** The periodic on/off photocurrent response spectra of MnO<sub>x</sub> and Ru/MnO<sub>x</sub>.

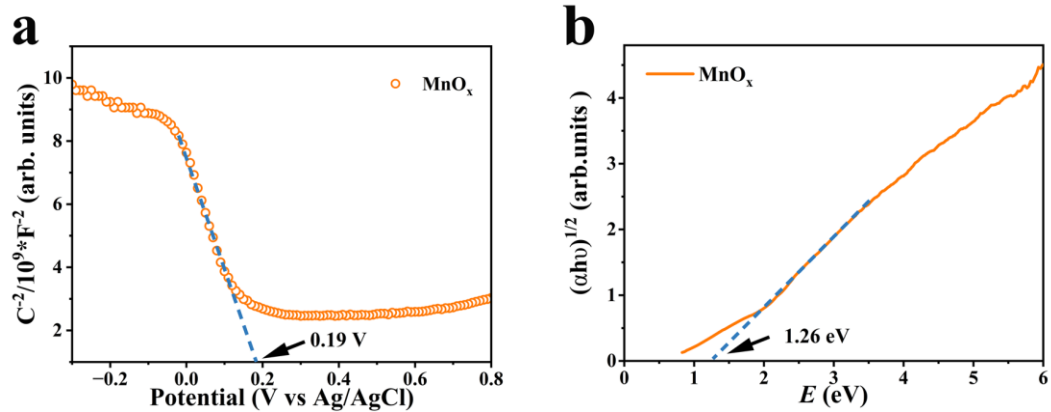

**Supplementary Fig. 22** (a) Mott–Schottky plots of the MnO<sub>x</sub>; (b) The bandgap value of the MnO<sub>x</sub>.

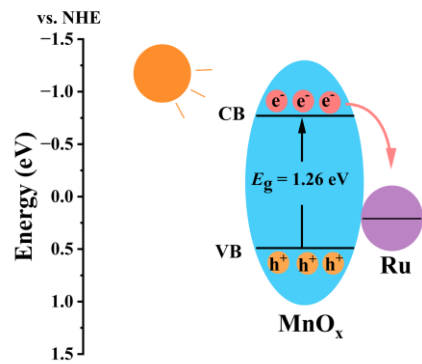

**Supplementary Fig. 23** The work function of Ru and band structures of  $\text{MnO}_x$ .



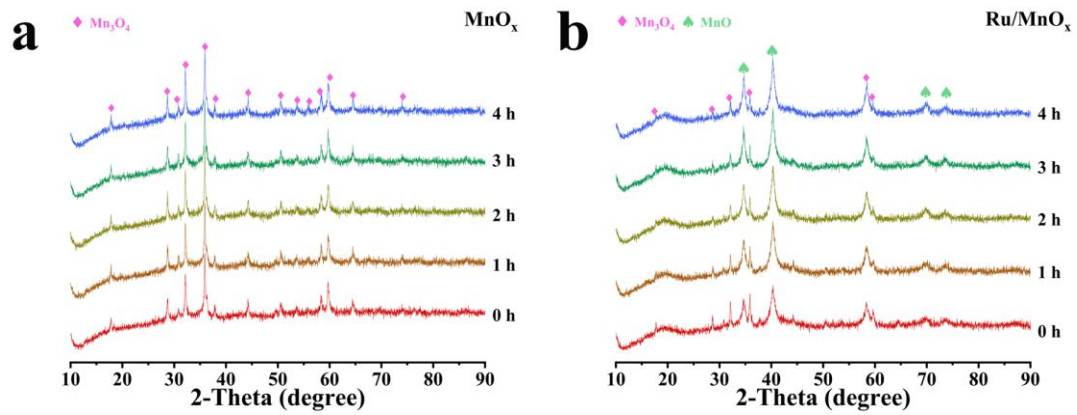

**Supplementary Fig. 24** The different time of variable temperature XRD results in 20%  $\text{CO}_2/\text{H}_2$  atmosphere at 200 °C: (a)  $\text{MnO}_x$ ; (b)  $\text{Ru/MnO}_x$ .

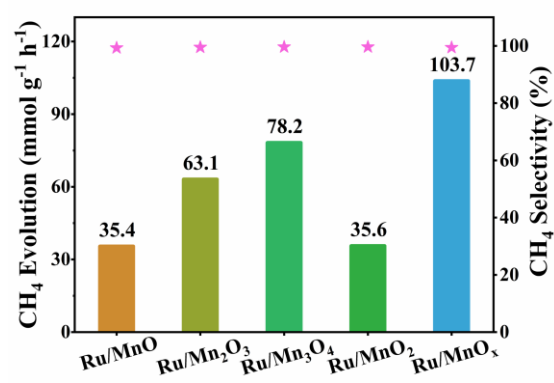

**Supplementary Fig. 25** Influence of various manganese oxide on CH<sub>4</sub> evolution rate. Reaction conditions: 15 mg of catalyst, full-arc 300 W UV-xenon lamp, 2.5 W cm<sup>-2</sup>, 200 °C, irradiation time 4 hours, initial pressure 1 MPa (H<sub>2</sub>/CO<sub>2</sub> = 1/1).

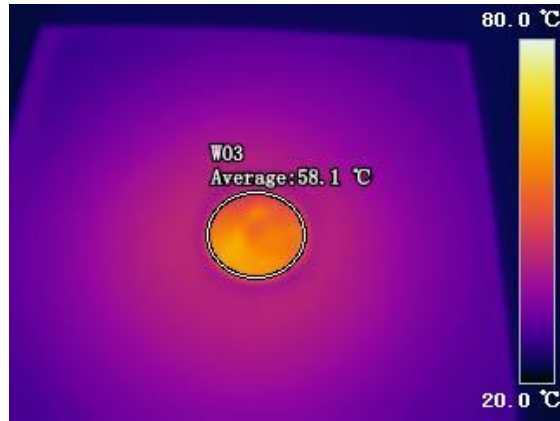

**Supplementary Fig. 26** Infrared thermal images captured for  $\text{WO}_3$  under  $0.3 \text{ W cm}^{-2}$  illumination.

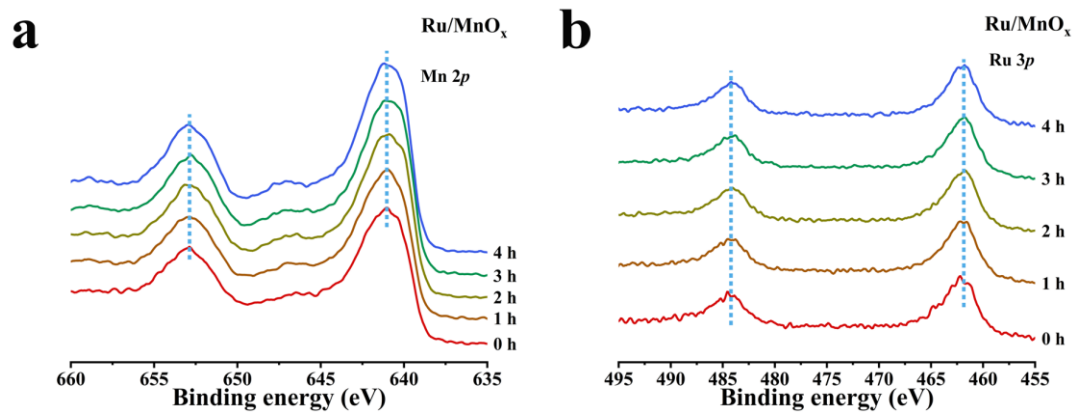

**Supplementary Fig. 27** XPS spectra of Ru/MnO<sub>x</sub> in 20% CO<sub>2</sub>/H<sub>2</sub> atmosphere under variable time at 200 °C: (a) High-resolution of Mn 2p XPS spectra; (b) High-resolution of Ru 3p XPS spectra.

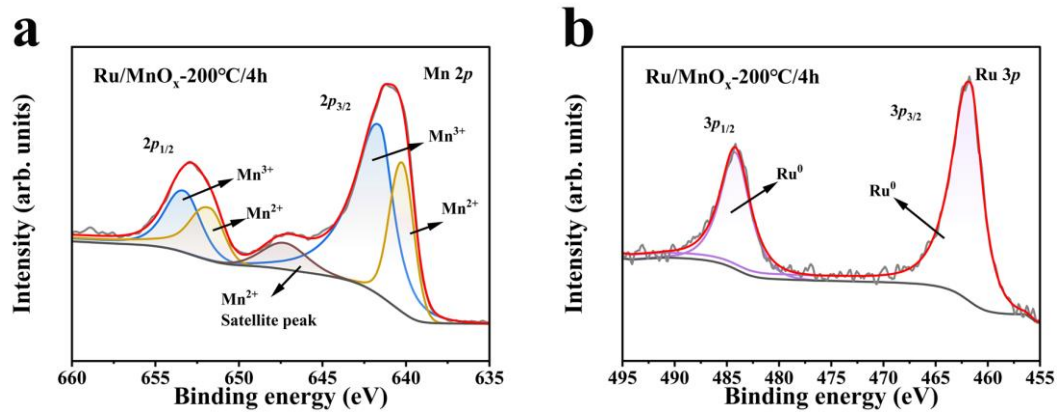

**Supplementary Fig. 28** XPS spectra of Ru/MnO<sub>x</sub> after reacting at 200 °C for 4 h in a 20% CO<sub>2</sub>/H<sub>2</sub> atmosphere: (a) High-resolution of Mn 2p XPS spectra; (b) High-resolution of Ru 3p XPS spectra.

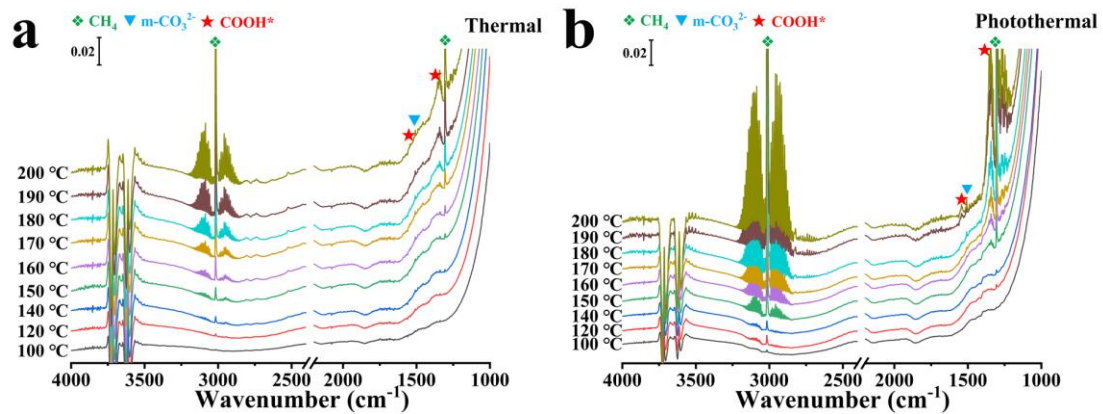

**Supplementary Fig. 29** Spectra of FT-IR study of Ru/MnO<sub>x</sub> at different conditions: (a) Effect of different temperature under thermal condition; (b) Effect of different temperature under photothermal conditions.

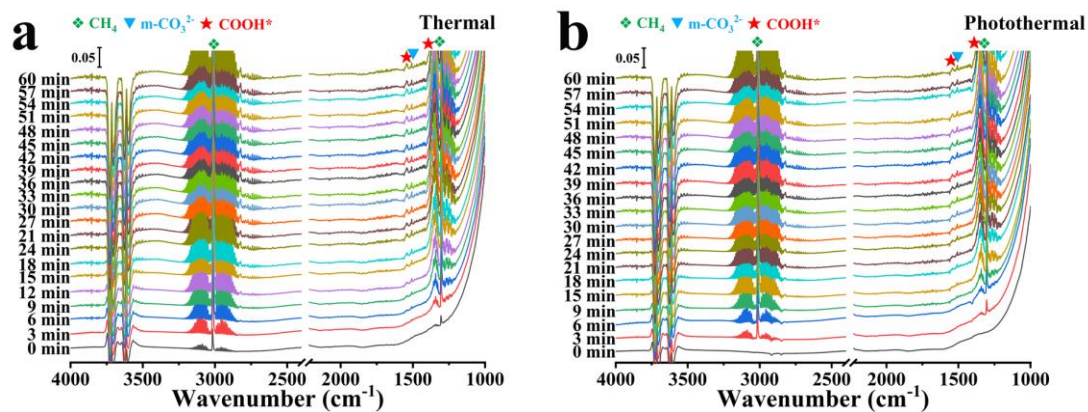

**Supplementary Fig. 30** Spectra of FT-IR study of Ru/MnO<sub>x</sub> at different conditions: (a) Effect of different time at 200 °C under thermal condition; (b) Effect of different time at 200 °C under photothermal conditions.

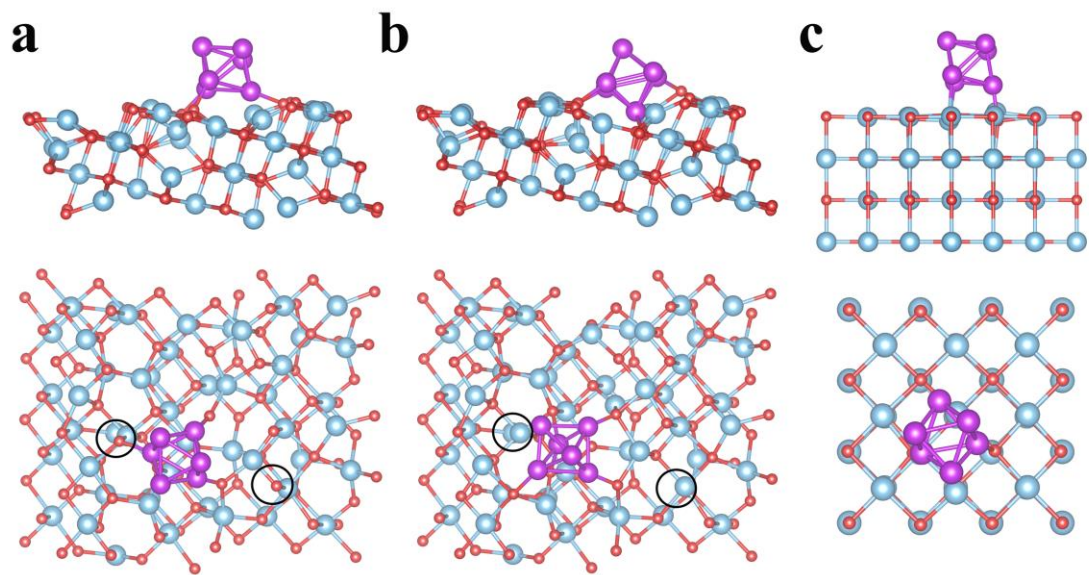

**Supplementary Fig. 31** Calculation model of (a) Ru/Mn<sub>3</sub>O<sub>4</sub> (321), (b) Ru/Mn<sub>3</sub>O<sub>4-x</sub> (321) and (c) Ru/MnO (200).



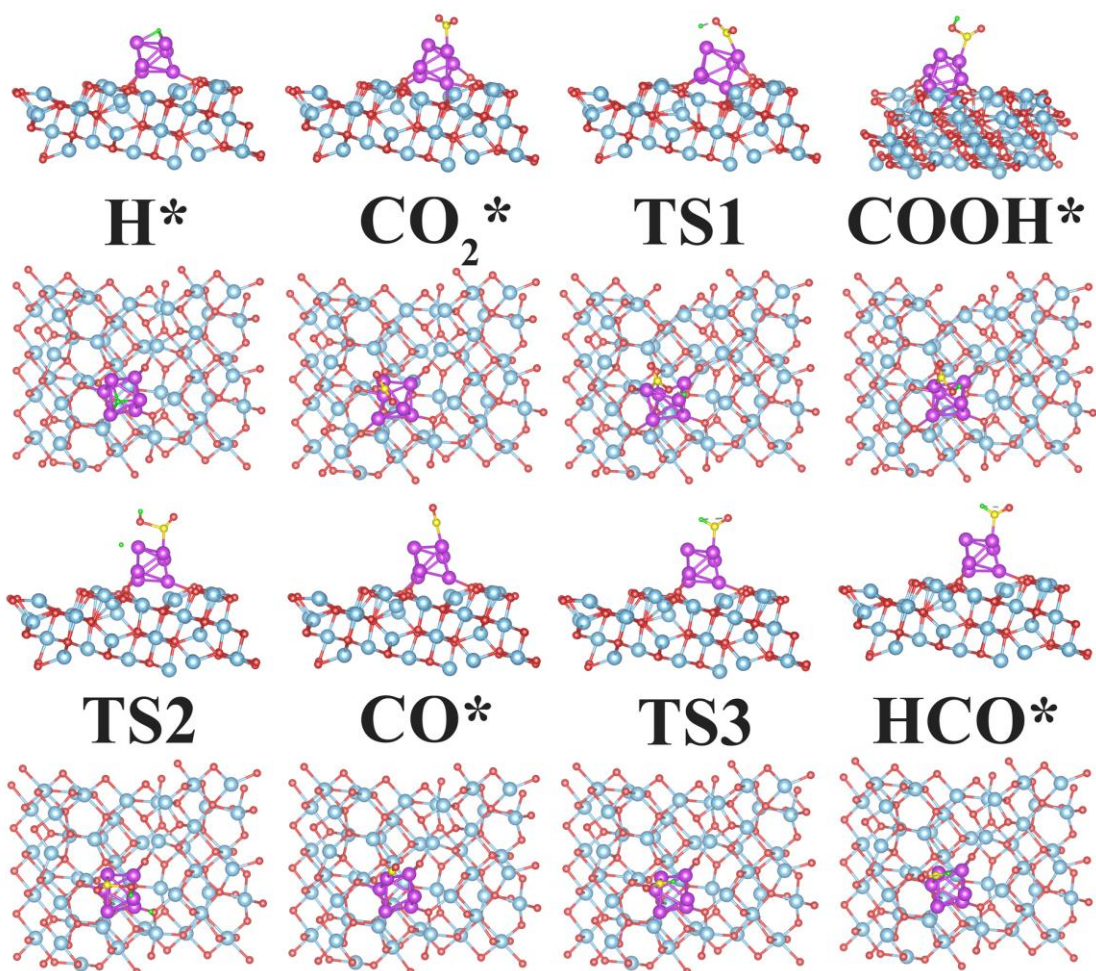

**Supplementary Fig. 32** Adsorption configurations of all the involved species on Ru/Mn<sub>3</sub>O<sub>4</sub> (321). The blue, red, purple, yellow, and green spheres represent the Mn, O, Ru, C, and H atoms, respectively.

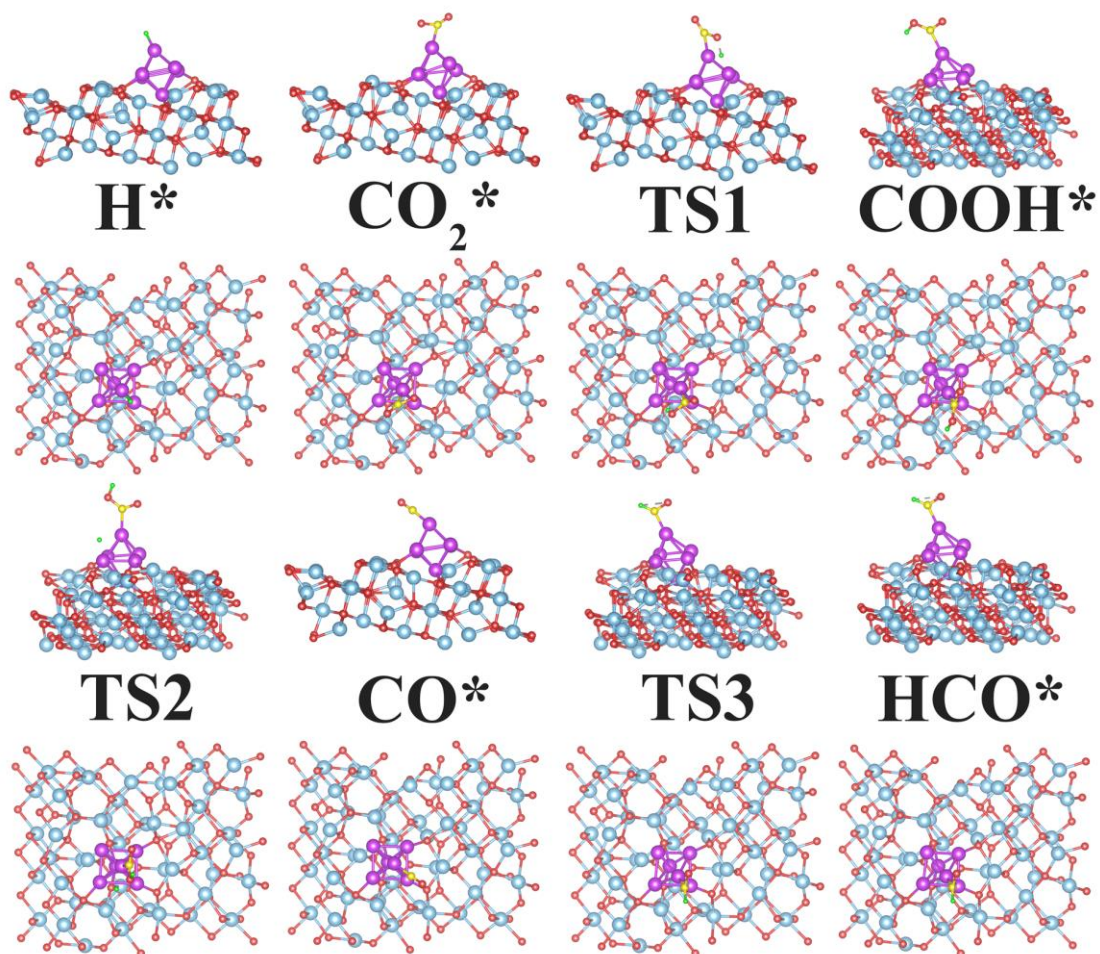

**Supplementary Fig. 33** Adsorption configurations of all the involved species on Ru/Mn<sub>3</sub>O<sub>4-x</sub> (321). The blue, red, purple, yellow, and green spheres represent the Mn, O, Ru, C, and H atoms, respectively.

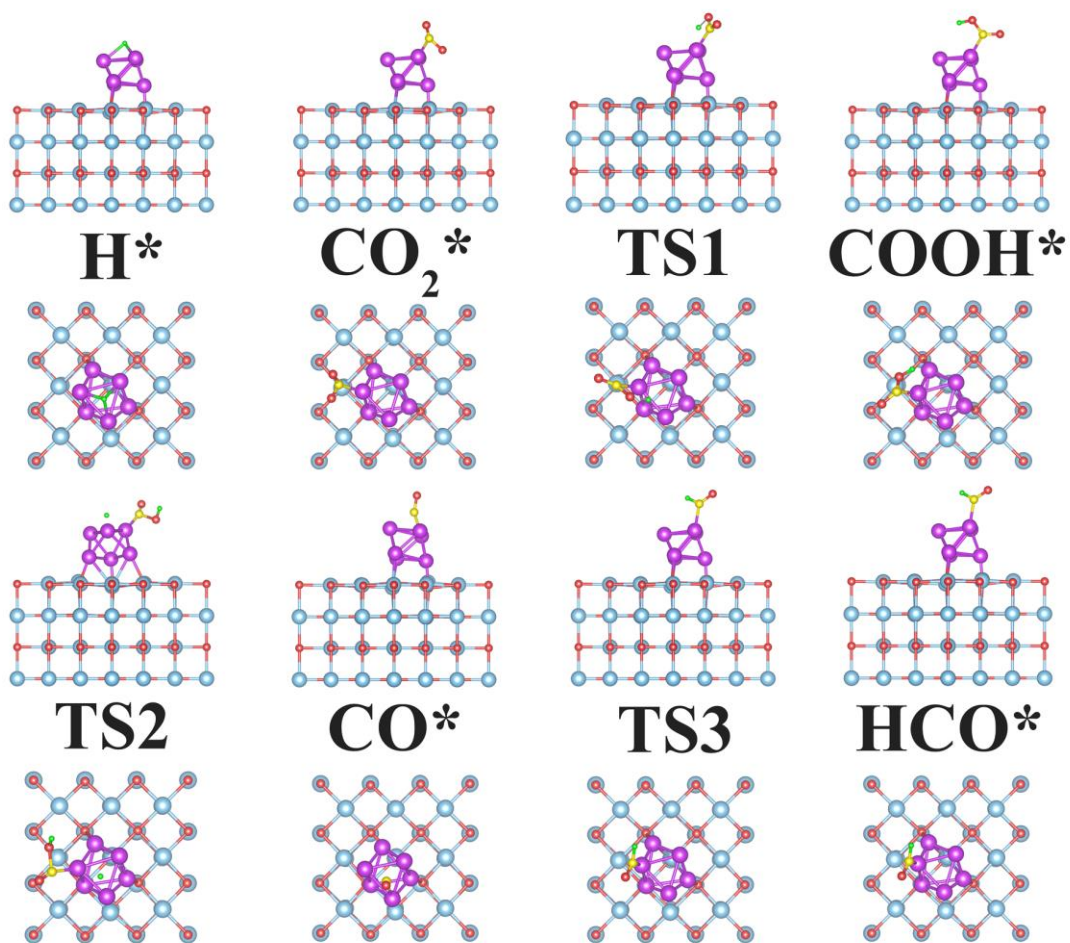

**Supplementary Fig. 34** Adsorption configurations of all the involved species on Ru/MnO (200). The blue, red, purple, yellow, and green spheres represent the Mn, O, Ru, C, and H atoms, respectively.

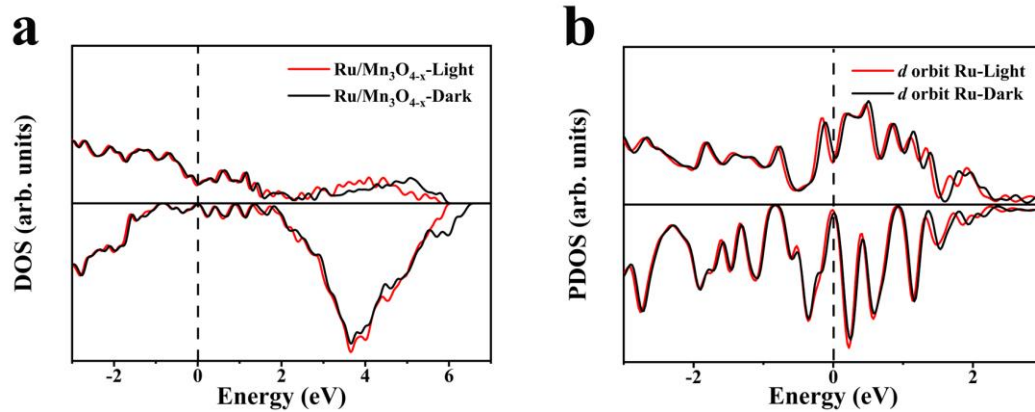

**Supplementary Fig. 35** The calculated (a) densities of states and (b) projected densities of states for Ru/Mn<sub>3</sub>O<sub>4-x</sub> under dark and light conditions. Fermi levels are at 0 eV.

**Supplementary Table 1** ICP-OES analysis of Ru/MnO<sub>x</sub>.

| Catalyst                | Ru (wt%) | RuCl <sub>3</sub> ·3H <sub>2</sub> O addition (mmol) |
|-------------------------|----------|------------------------------------------------------|
| 1.4%Ru/MnO <sub>x</sub> | 1.4      | 0.02                                                 |
| 2.8%Ru/MnO <sub>x</sub> | 2.8      | 0.04                                                 |
| 4.0%Ru/MnO <sub>x</sub> | 4.0      | 0.06                                                 |
| 5.8%Ru/MnO <sub>x</sub> | 5.8      | 0.08                                                 |
| 7.3%Ru/MnO <sub>x</sub> | 7.3      | 0.1                                                  |
| 8.1%Ru/MnO <sub>x</sub> | 8.1      | 0.12                                                 |

**Supplementary Table 2** Crystal parameters and reliability factors of the refinement for MnO<sub>x</sub> and Ru/MnO<sub>x</sub>.

| Sample                  | MnO <sub>x</sub> |                                |            | Ru/MnO <sub>x</sub> |                                |            |
|-------------------------|------------------|--------------------------------|------------|---------------------|--------------------------------|------------|
|                         | Phase            | Mn <sub>3</sub> O <sub>4</sub> | MnOOH      | MnO <sub>2</sub>    | Mn <sub>3</sub> O <sub>4</sub> | MnOOH      |
| Abundance (%)           | 69.023           | 25.976                         | 5.002      | 72.528              | 27.544                         | 0.928      |
| Space group             | I41/amd          | P-3m1                          | C12/m1     | I41/amd             | P-3m1                          | C12/m1     |
| a (Å)                   | 5.7702(4)        | 3.2031(16)                     | 5.1657(61) | 5.7698(2)           | 3.2016(17)                     | 5.1657(61) |
| b(Å)                    | 5.7702(4)        | 3.2031(16)                     | 2.8645(61) | 5.7698(2)           | 3.2016(17)                     | 2.8645(33) |
| c(Å)                    | 9.4544(9)        | 4.6199(9)                      | 7.0860(32) | 9.4490(5)           | 4.6141(7)                      | 7.0860(32) |
| Volume(Å <sup>3</sup> ) | 314.796(62)      | 41.050(42)                     | 104.17(18) | 314.569(31)         | 40.959(44)                     | 104.17(18) |
| R <sub>wp</sub>         |                  | 1.62%                          |            |                     | 1.71%                          |            |
| R <sub>p</sub>          |                  | 1.25%                          |            |                     | 1.33%                          |            |
| GOF                     |                  | 1.34                           |            |                     | 1.33                           |            |



**Supplementary Table 3** The summarized CH<sub>4</sub> yields for recently reported photo-thermo-catalysts.

| Catalysts                                                            | Metal loading (wt%) | H <sub>2</sub> :CO <sub>2</sub> ratio | Pressure (Mpa) | Light sources                | Light intensity (W cm <sup>-2</sup> ) | Temperature (°C)         | CH <sub>4</sub> production rate (mmol g <sup>-1</sup> h <sup>-1</sup> ) | CO <sub>2</sub> conversion (%) | CH <sub>4</sub> selectivity (%) | TOF (h <sup>-1</sup> ) | Ref       |
|----------------------------------------------------------------------|---------------------|---------------------------------------|----------------|------------------------------|---------------------------------------|--------------------------|-------------------------------------------------------------------------|--------------------------------|---------------------------------|------------------------|-----------|
| Ru/MnO <sub>x</sub>                                                  | 7.3                 | 4:1                                   | 1              | 300 W Xe lamp<br>200-1100 nm | 2.5                                   | 200<br>(external heater) | 166.7                                                                   | 66.8                           | 99.5                            | 232                    | This work |
| Co <sub>7</sub> Cu <sub>1</sub> Mn <sub>1</sub> O <sub>x</sub> (200) | —                   | 3:1                                   | 0.1            | 300 W Xe lamp<br>300-1100 nm | 0.234                                 | 200<br>(external heater) | 14.5                                                                    | 27.45                          | 85.3                            | —                      | 1         |
| Ru/Al <sub>2</sub> O <sub>3</sub>                                    | 2.4                 | 4:1                                   | 0.08           | 1000 W Xe lamp               | —                                     | 396                      | 115                                                                     | 0.95                           | 99.2                            | 484                    | 2         |
| Cu <sub>2</sub> O/Graphene                                           | —                   | 4:1                                   | 0.13           | 300 W Xe lamp                | 0.2                                   | 250<br>(external heater) | 14.93 (Cu)                                                              | 2.84                           | 99                              | 0.256                  | 3         |
| Ru@Ni <sub>2</sub> V <sub>2</sub> O <sub>7</sub>                     | 0.35                | 4:1                                   | 0.067          | 300 W Xe lamp                | 2                                     | 350                      | 114.9                                                                   | 96.3                           | 99.3                            | 3340                   | 4         |
| Ru/Mg(OH) <sub>2</sub>                                               | 11.5                | 1:1                                   | 0.1            | 300 W Xe lamp                | 1.8                                   | —                        | 44.85                                                                   | 1.68                           | 69.5                            | 56.7                   | 5         |
| Rh/Al                                                                | 5                   | 3:1                                   | 1.5            | 300 W Xe lamp                | 11.3                                  | 200<br>(external heater) | 550                                                                     | —                              | 99                              | 1132                   | 6         |
| 21%Co/Al <sub>2</sub> O <sub>3</sub>                                 | 0.21                | 4:1                                   | 0.1            | 300 W Xe lamp<br>200-1100 nm | 1.3                                   | 292                      | 6.04                                                                    | —                              | 97.7                            | 1.74                   | 7         |
| Ru-TiO <sub>x</sub>                                                  | 1.77                | 4:1                                   | —              | 300 W Xe lamp                | 2                                     | 276                      | 22.35                                                                   | —                              | 99.99                           | 12.76                  | 8         |
| Ir@UiO66                                                             | 0.14                | 4:1                                   | 0.1            | 300 W Xe lamp                | 2.3                                   | 250<br>(external heater) | 19.9<br>(Flow reactor)                                                  | 9.3                            | 95                              | 2876                   | 9         |
| 8 % Ru/SiO <sub>2</sub>                                              | 0.8                 | 6:1                                   | —              | 300 W Xe lamp                | 0.063                                 | 300<br>(external heater) | 55.44<br>(Flow reactor)                                                 | 51.8                           | 99                              | 70                     | 10        |
| Ru-Al <sub>2</sub> O <sub>3-x</sub> -L                               | 0.7                 | 4:1                                   | 0.1            | 300 W Xe lamp                | 2.27                                  | 236                      | 0.84                                                                    | 86.47                          | 99                              | 1248                   | 11        |
| Ru/H <sub>x</sub> MoO <sub>3-y</sub>                                 | 4                   | 1:1                                   | —              | 300 W Xe lamp<br>Vis-IR      | 0.75                                  | 140<br>(external heater) | 20.8<br>(Flow reactor)                                                  | —                              | 99                              | 52.6                   | 12        |

## Supplementary References

1. He Z, *et al.* Photothermal CO<sub>2</sub> hydrogenation to hydrocarbons over trimetallic Co–Cu–Mn catalysts. *Green Chemistry* **23**, 5775-5785 (2021).
2. Grote R, *et al.* Collective photothermal effect of Al<sub>2</sub>O<sub>3</sub>-supported spheroidal plasmonic Ru nanoparticle catalysts in the sunlight-powered Sabatier reaction. *ChemCatChem* **12**, 5618-5622 (2020).
3. Mateo D, Albero J, García H. Photoassisted methanation using Cu<sub>2</sub>O nanoparticles supported on graphene as a photocatalyst. *Energy & Environmental Science* **10**, 2392-2400 (2017).
4. Chen Y, *et al.* Cooperative catalysis coupling photo-/photothermal effect to drive Sabatier reaction with unprecedented conversion and selectivity. *Joule* **5**, 3235-3251 (2021).
5. Kong N, *et al.* Ruthenium nanoparticles supported on Mg(OH)<sub>2</sub> microflowers as catalysts for photothermal carbon dioxide hydrogenation. *ACS Applied Nano Materials* **3**, 3028-3033 (2020).
6. Fu G, *et al.* Rh/Al nanoantenna photothermal catalyst for wide-spectrum solar-driven CO<sub>2</sub> methanation with nearly 100% selectivity. *Nano Letters* **21**, 8824-8830 (2021).
7. Chen X, *et al.* MOF-templated preparation of highly dispersed Co/Al<sub>2</sub>O<sub>3</sub> composite as the photothermal catalyst with high solar-to-fuel efficiency for CO<sub>2</sub> methanation. *ACS Applied Materials & Interfaces* **12**, 39304-39317 (2020).
8. Dong T, *et al.* Ru decorated TiO<sub>x</sub> nanoparticles via laser bombardment for photothermal co-catalytic CO<sub>2</sub> hydrogenation to methane with high selectivity. *Applied Catalysis B: Environmental* **326**, 122176 (2023).
9. Tang Y, *et al.* Encapsulating Ir nanoparticles into UiO-66 for photo-thermal catalytic CO<sub>2</sub> methanation under ambient pressure. *Journal of Materials Chemistry A* **10**, 12157-12167 (2022).
10. Kim C, *et al.* Energy-efficient CO<sub>2</sub> hydrogenation with fast response using photoexcitation of CO<sub>2</sub> adsorbed on metal catalysts. *Nature Communications* **9**, 3027 (2018).
11. Liu X, *et al.* Strong interaction over Ru/defects-rich aluminium oxide boosts photothermal CO<sub>2</sub> methanation via microchannel flow-type system. *Advanced Energy Materials* **12**, 2201009 (2022).
12. Ge H, Kuwahara Y, Kusu K, Bian Z, Yamashita H. Ru/H<sub>x</sub>MoO<sub>3-y</sub> with plasmonic effect for boosting photothermal catalytic CO<sub>2</sub> methanation. *Applied Catalysis B: Environmental* **317**, 121734 (2022).
